# Supplementary material for: Thermostable, Dissolvable Buccal Film Rotavirus Vaccine Is Highly Effective in Neonatal Gnotobiotic Pig Challenge Model
Source: MDPI journal article supplement (doi:10.3390/vaccines9050437), 2021-04-30
Supplement: s1 [file s1]

**Table S1.** Diarrhea incidences in Gn pigs from PID 0 to PID 28/PCD 0 before challenge<sup>a</sup>

| Group                              | Placebo film |       |       |       |       |       | Liquid vaccine |       |       |       |       |       | Preserved film vaccine |       |       |       |       |
|------------------------------------|--------------|-------|-------|-------|-------|-------|----------------|-------|-------|-------|-------|-------|------------------------|-------|-------|-------|-------|
| PID/PCD                            | Pig 1        | Pig 2 | Pig 3 | Pig 4 | Pig 5 | Pig 6 | Pig 1          | Pig 2 | Pig 3 | Pig 4 | Pig 5 | Pig 6 | Pig 1                  | Pig 2 | Pig 3 | Pig 4 | Pig 5 |
| 0                                  |              |       |       |       |       |       |                |       |       |       |       |       |                        |       |       |       |       |
| 10                                 |              |       |       |       |       |       | 2              | 2     |       |       |       |       |                        |       | 2     |       |       |
| 16                                 |              |       |       |       |       |       | 2              | 2     |       |       |       |       |                        |       |       |       |       |
| 17                                 |              | 2     |       |       |       |       | 3              |       |       | 2     |       |       | 2                      | 2     | 2     |       |       |
| 23                                 |              |       |       |       |       |       |                |       |       |       |       |       | 2                      | 2     | 2     |       | 2     |
| 24                                 |              | 2     |       |       |       |       |                |       |       |       |       |       |                        |       |       |       |       |
| 28/0                               |              |       | 3     |       |       |       | 2              | 3     |       |       |       |       | 2                      |       |       |       | 2     |
| Incidence of diarrhea              | 3            |       |       |       |       |       | 8              |       |       |       |       |       | 10 <sup>b</sup>        |       |       |       |       |
| Total diarrhea score from PID 0-28 | 6            |       |       |       |       |       | 19             |       |       |       |       |       | 20                     |       |       |       |       |

Note:

a. Pigs were monitored for overall health status and especially for diarrhea by trained staff. When there is a sign of diarrhea, rectal swabs were taken and fecal consistency scores were recorded. Scores of 2 or higher are considered diarrheic. Blank cells in the table indicate there is no diarrhea in the pigs. **Total diarrhea score is the sum of the scores in each group from PID 0-28.**

b. The incidence of diarrhea in the preserved film vaccine group was significantly higher than the placebo film group from PID 0 to PID 28/PCD 0 ( $p=0.0124$ ; Chi-Square Pearson test).
